# Supplementary material for: The Role of Chaperone-Mediated Autophagy in Bortezomib Resistant Multiple Myeloma
Source: MDPI journal article supplement (doi:10.3390/cells10123464), 2021-12-08
Supplement: s1 [file s1]

Supplementary data

Table S1. Patient characteristics

| Patient characteristics      | Total (n = 29) |
|------------------------------|----------------|
| Age, years (mean $\pm$ SD)   | 63 $\pm$ 10.15 |
| Newly Diagnosed MM           | 18 (62.1%)     |
| Relapsed MM                  | 11 (37.9%)     |
| Myeloma Subtypes             |                |
| IgG                          | 16 (55.2%)     |
| IgA                          | 3 (10.3%)      |
| IgM                          | 0              |
| Light Chain Disease          | 10 (34.5%)     |
| Kappa                        | 3 (10.3%)      |
| Lambda                       | 7 (24.1%)      |
| International Staging System |                |
| Stage I                      | 12 (41.4%)     |
| Stage II                     | 5 (17.2%)      |
| Stage III                    | 5 (17.2%)      |
| Unknown                      | 7 (24.1%)      |
